# Supplementary material for: Individualized Meropenem Dosing in CRRT Patients: Development and Validation of a Machine Learning-Based Decision Support Tool
Source: Research Square preprint supplement (doi:10.21203/rs.3.rs-7564311/v1), 2025-09-19
Supplement: Supplementary file 1 [file 748fce20abb43a79e7396277.docx]

**Supplementary material**

**Table S1.** Comparison of predictors in the training and testing datasets.

| **Variable** | **Training set** | **Test set** | **p-value** |
| --- | --- | --- | --- |
| **Age (years)** | 61.00 [54.00-70.00] | 61.00 [54.00-70.00] | 0.13 |
| **Weight (kg)** | 64.00 [60.00-69.00] | 64.00 [60.00-69.00] | 0.93 |
| **Sex** | | | | |
| **- Male** | 76.02% | 23.81% | 0.36 |
| **- Female** | 23.98% | 76.19% |
| **CRCL (mL/min)** | 14.16 [6.90-22.19] | 14.17 [6.90-22.19] | 0.90 |
| **CLCRRT(L/h)** | 1.96 [1.74-2.25] | 1.96 [1.74-2.25] | 0.17 |
| **APACHE II score** | 20.00 [15.00-25.00] | 20.00 [15.00-25.00] | 0.95 |
| **AMT (mg)** | 1000.00 [500.00-2000.00] | 1000.00 [500.00-2000.00] | 0.19 |
| **RATE (mL/h)** | 666.67 [166.67-4000.00] | 666.67 [166.67-4000.00] | 0.78 |
| **MIC (mg/L)** | 2.00 [0.25-16.00] | 2.00 [0.25-16.00] | 0.39 |
| **TAU (h)** | 8.00 [6.00-12.00] | 8.00 [6.00-12.00] | 0.77 |

Data are presented as median [min-max] for continuous variables and as percentages for categorical variables. The Wilcoxon rank-sum test was used for continuous variables, and the chi-squared test was used for categorical variables to compare the training and testing datasets. No significant differences were observed between the two datasets (p > 0.05 for all comparisons). **Abbreviations:** CRCL, creatinine clearance; APACHE II, Acute Physiology and Chronic Health Evaluation II; AMT, dose amount; RATE, infusion rate; MIC, minimum inhibitory concentration; TAU, dosing interval.

**Table S2.** Tuned hyperparameters for 6 ML models.

| **ML model** | **Parameters** |
| --- | --- |
| **RF** | {'criterion': 'gini', 'max_depth': 5, 'max_features': 2, 'min_samples_leaf': 1, 'min_samples_split': 2, 'n_estimators': 80} |
| **XGBoost** | {'colsample_bytree': 0.8, 'gamma': 0.6, 'learning_rate': 0.2, 'max_depth': 5, 'n_estimators': 100, 'reg_alpha': 1, 'reg_lambda': 1, 'subsample': 0.8} |
| **AdaBoost** | {'algorithm': 'SAMME.R', 'learning_rate': 0.1, 'n_estimators': 50} |
| **DT** | {'criterion': 'gini', 'max_depth': None, 'max_features': None, 'min_samples_leaf': 2, 'min_samples_split': 2} |
| **GB** | {'criterion': 'friedman_mse', 'learning_rate': 0.1, 'max_depth': 3, 'max_features': None, 'min_samples_leaf': 1, 'min_samples_split': 2, 'n_estimators': 100, 'subsample': 1.0} |
| **LR** | {'C': 10, 'penalty': 'l2', 'solver': 'liblinear'} |

**Abbreviations:** RF, Random Forest; XGBoost, Extreme Gradient Boosting; AdaBoost, Adaptive Boosting; DT, Decision Tree; GB, Gradient Boosting; LR, Logistic Regression.

**Table S3.** MeroDose Web Application Code.

| import streamlit as st  import numpy as np  import pandas as pd  import joblib  import plotly.graph_objects as go  # === Page configuration ===  st.set_page_config(page_title="MeroDose - Meropenem PD Prediction Tool", layout="centered")  # === Custom CSS ===  st.markdown(  """  <style>  /* Main content area with white background, rounded corners, shadow, centered */  .main .block-container {  background: #ffffffcc;  border-radius: 12px;  padding: 30px 40px 40px 40px;  box-shadow: 0 8px 24px rgba(0,0,0,0.12);  max-width: 700px;  margin: 30px auto;  }  /* Title font color Indigo */  .css-15zrgzn h1 {  color: #4b0082;  font-weight: 700;  }  /* Prediction metric area with light green background */  .stMetric {  background-color: #d6f5d6 !important;  border-radius: 10px;  padding: 12px;  }  </style>  """,  unsafe_allow_html=True,  )  # === Load models and scalers ===  scaler_4mic = joblib.load("scaler_adaboost_4mic.pkl")  scaler_mic = joblib.load("scaler_adaboost_mic.pkl")  model_4mic = joblib.load("adaboost_4mic.pkl")  model_mic = joblib.load("adaboost_mic.pkl")  # === Title and description ===  st.title("💊 MeroDose")  st.markdown(  """  **MeroDose: Meropenem Individualized Dosing Decision Support Tool**  This tool predicts the probability of achieving **100% fT>MIC** and **100% fT>4×MIC**  to support individualized meropenem dosing in **critically ill patients undergoing continuous renal replacement therapy (CRRT) receiving meropenem therapy**.  """  )  # === Input form ===  st.header("Patient & Dosing Information")  # Create two-column layout for inputs  col1, col2 = st.columns(2)  # 1. Basic information  with col1:  age = st.number_input("Age (years)", value=55.0)  wt = st.number_input("Weight (kg)", value=75.0)  mic = st.number_input("Pathogen MIC (mg/L)", value=1.0)  with col2:  sex = st.selectbox("Sex", options=["Male", "Female"])  crcl = st.number_input("Creatinine Clearance (ml/min)", value=0.53)  clcrrt = st.number_input("CRRT Clearance (ml/min)", value=1.80)  # 2. Clinical scores and dosing information  with col1:  apacheii = st.number_input("APACHE II Score", value=24.0)  dose = st.number_input("Dose (mg)", value=1000.0, help="Total dose administered.")  with col2:  rate = st.number_input("Infusion Rate (mg/h)", value=500.0, help="Infusion speed.")  tau = st.number_input("Dosing Interval (h)", value=8.0)  submitted = st.button("Predict")  # === Prediction calculation ===  if submitted:  sex_encoded = 1 if sex == "Male" else 0  continuous_vars = ["AMT", "RATE", "AGE", "WT", "CRCL", "CLCRRT", "APACHEII", "MIC", "TAU"]  # Construct input DataFrame with column names  input_cont = pd.DataFrame([[dose, rate, age, wt, crcl, clcrrt, apacheii, mic, tau]], columns=continuous_vars)  # 4×MIC prediction  input_scaled_4mic = scaler_4mic.transform(input_cont)  input_df_4mic = pd.DataFrame(input_scaled_4mic, columns=continuous_vars)  input_df_4mic["SEX_1"] = sex_encoded  expected_features_4mic = continuous_vars + ["SEX_1"]  for col in expected_features_4mic:  if col not in input_df_4mic.columns:  input_df_4mic[col] = 0  input_df_4mic = input_df_4mic[expected_features_4mic]  pred_4mic = model_4mic.predict(input_df_4mic)[0]  prob_4mic = model_4mic.predict_proba(input_df_4mic)[0][1]  # MIC prediction  input_scaled_mic = scaler_mic.transform(input_cont)  input_df_mic = pd.DataFrame(input_scaled_mic, columns=continuous_vars)  input_df_mic["SEX_1"] = sex_encoded  expected_features_mic = continuous_vars + ["SEX_1"]  for col in expected_features_mic:  if col not in input_df_mic.columns:  input_df_mic[col] = 0  input_df_mic = input_df_mic[expected_features_mic]  pred_mic = model_mic.predict(input_df_mic)[0]  prob_mic = model_mic.predict_proba(input_df_mic)[0][1]  # === Display results ===  st.subheader("Prediction Results")  col1, col2 = st.columns(2)  with col1:  st.metric(  label="100% fT > 4×MIC Target",  value="Achieved ✅" if pred_4mic == 1 else "Not Achieved ❌",  delta=f"{prob_4mic:.2%} Probability",  )  with col2:  st.metric(  label="100% fT > MIC Target",  value="Achieved ✅" if pred_mic == 1 else "Not Achieved ❌",  delta=f"{prob_mic:.2%} Probability",  )  # === Probability Gauges ===  st.markdown("### Probability Gauges")  gauge_col1, gauge_col2 = st.columns(2)  with gauge_col1:  fig1 = go.Figure(go.Indicator(  mode="gauge+number",  value=prob_4mic*100,  title={'text': "100% fT > 4×MIC Target (%)"},  gauge={'axis': {'range': [0, 100]},  'bar': {'color': "green" if pred_4mic == 1 else "red"},  'threshold': {'line': {'color': "black", 'width': 4}, 'thickness': 0.75, 'value': 90}}  ))  st.plotly_chart(fig1, use_container_width=True)  with gauge_col2:  fig2 = go.Figure(go.Indicator(  mode="gauge+number",  value=prob_mic*100,  title={'text': "100% fT > MIC Target (%)"},  gauge={'axis': {'range': [0, 100]},  'bar': {'color': "green" if pred_mic == 1 else "red"},  'threshold': {'line': {'color': "black", 'width': 4}, 'thickness': 0.75, 'value': 90}}  ))  st.plotly_chart(fig2, use_container_width=True)  st.info("⚠️ These predictions are for reference only. Combine with TDM and clinical judgement.") |
| --- |
